# Supplementary material
Source: PubMed Central journal article supplement (PMC2777817)

1 **Sup. Figure 1: Cumulative distribution of AHP peaks from Trained Cohort**

2 Not every cell from a trained animal which learned has a small AHP; The  
3 learning-related reduction of the AHP represents a population shift. The  
4 population of AHPs from animals that learned the fear task (*Paired* and *Shock*  
5 combined) shift to smaller peak, area and 1 second measures, as compared to  
6 control animals (*Naïve* and *Tone*).

7  
8 If there were 2 populations within the cells recorded from animals that learned,  
9 AHP values from the Learner group would not have a normal distribution, and  
10 would exhibit either a skewed “tail”, or a bi-modal distribution. However, this was  
11 not the case. Both the Learner and Control groups have a normal distribution of  
12 AHP values, with 68% of the values within 1 standard deviation (SD) of the  
13 mean, 95% within 2 SDs, and 100% within 3 SDs. Further, the skewness  
14 measure of both the Learner and Controls was quite small (Controls: -0.452,  
15 Learners: -0.283). Both these measures indicate that there is only one  
16 population of cells within the group of animals that learned, that has shifted to  
17 smaller values.

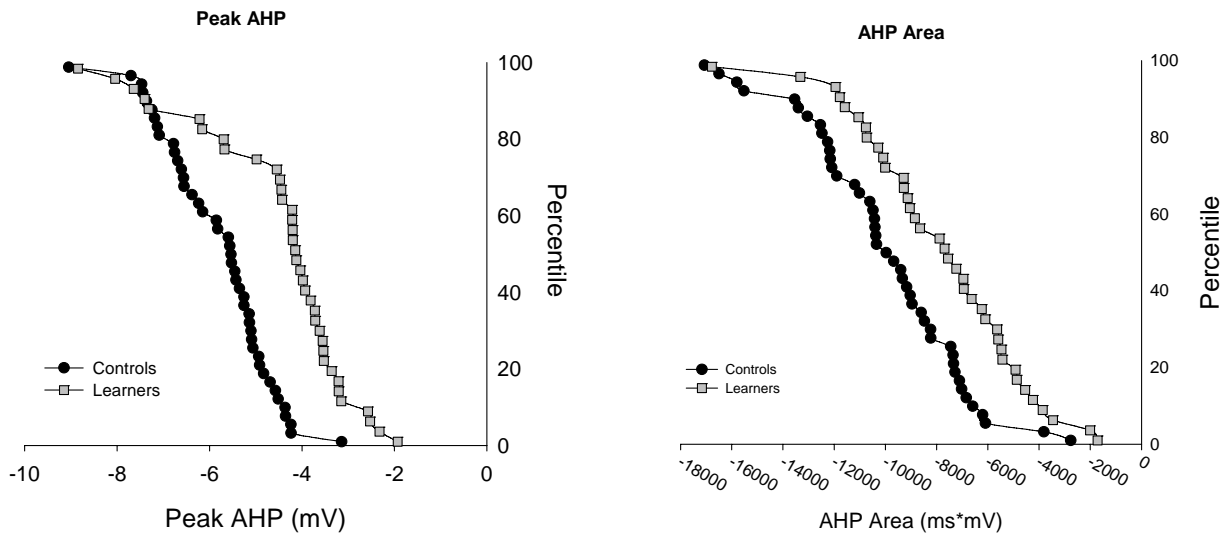

21

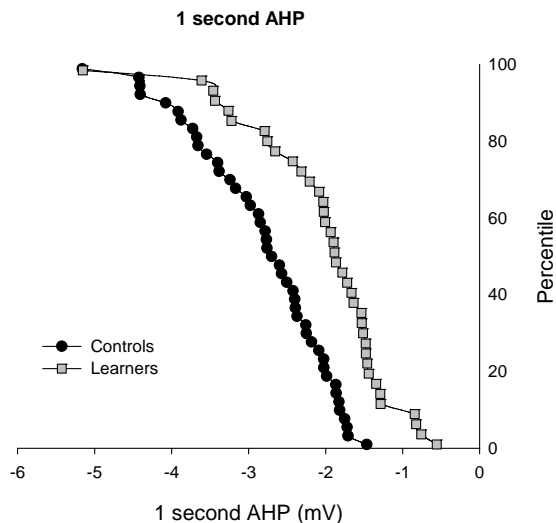

Supplement: 00347.2009_1.pdf [file 00347.2009_1.pdf]
