# Supplementary material
Source: PubMed Central journal article supplement (PMC2777817)
Supplement: 00347.2009_2.pdf [file 00347.2009_2.pdf]

**Supplemental Table: Percent time spent freezing for all animals in all cohorts**

|                                 |                     | <i><b>Trial 1</b></i> |             |              | <i><b>Trial 2</b></i> |              |            | <i><b>Trial 3</b></i> |              |             |
|---------------------------------|---------------------|-----------------------|-------------|--------------|-----------------------|--------------|------------|-----------------------|--------------|-------------|
| <b>Cohort</b>                   |                     | <b>P</b>              | <b>S</b>    | <b>T</b>     | <b>P</b>              | <b>S</b>     | <b>T</b>   | <b>P</b>              | <b>S</b>     | <b>T</b>    |
| <i><b>Training</b></i>          | <i>Trained</i>      | 1.9 ± 1.7%            | 0.3 ± 0.2%  | 1.1 ± 0.7%   | 26.7 ± 0.7%           | 34.2 ± 12.4% | 8.3 ± 4.0% | 43.4 ± 7.9%           | 51.6 ± 11.2% | 17.1 ± 5.8% |
|                                 | <i>Tested</i>       | 1.6 ± 0.7%            | 0.6 ± 0.3%  | 0.9 ± 0.7%   | 46.1 ± 12.4%          | 33.5 ± 9.9%  | 9.0 ± 5.3% | 62.8 ± 9.1%           | 50.6 ± 15.7% | 21.9 ± 6.1% |
|                                 | <i>Extinguished</i> | 1.7 ± 1.5%            | 0.2 ± 0.1%  | ---          | 11.7 ± 3.4%           | 19.5 ± 5.4%  | ---        | 38.7 ± 9.0%           | 30.3 ± 8.8%  | ---         |
| <i><b>Testing – Context</b></i> | <i>Tested</i>       | 56.3 ± 9.7%           | 55.7 ± 9.4% | 24.5 ± 4.5%  | ---                   | ---          | ---        | ---                   | ---          | ---         |
|                                 | <i>Extinguished</i> | 35.1 ± 6.9%           | 25.4 ± 4.1% | ---          | 35.5 ± 8.6%           | 12.3 ± 3.7 % | ---        | 22.4 ± 7.7%           | 13.2 ± 6.1%  | ---         |
| <i><b>Testing – Cue</b></i>     | <i>Tested</i>       | 74.0 ± 12.3%          | 38.7 ± 6.5% | 35.7 ± 11.0% | ---                   | ---          | ---        | ---                   | ---          | ---         |
|                                 | <i>Extinguished</i> | 52.4 ± 9.7%           | 16.0 ± 4.6% | ---          | 27.5 ± 9.5%           | 5.5 ± 1.6%   | ---        | 31.9 ± 11.9%          | 14.0 ± 6.9%  | ---         |
